# Supplementary material
Source: HighWire-hosted journal article supplement (https://bmjopengastro.bmj.com/highwire/filestream/3187/field_highwire_adjunct_files/7/bmjgast-2022-000985supp008_data_supplement.xlsx)
Supplement: bmjgast-2022-000985supp008_data_supplement.xlsx [file bmjgast-2022-000985supp008_data_supplement.xlsx]

## Sheet: Figure 5
	AFO-202 Pre Vs post-intervention																N-163 Pre Vs post-intervention
																															AFO-202 + N-163 Pre Vs post-intervention

## Sheet: Supplementary Figure 6
	Control Pre Vs Post-intervention													Telmisartan Pre Vs post-intervention
